# Supplementary material
Source: publisher figshare collection journal article supplement (https://sage.figshare.com/ndownloader/files/18918935)
Supplement: Supplementary file 1 [file 18918935]

Herrero A, et al. Comparison of histologic methods for the detection of *Desmozon lepeophtherii* spores in the gills of Atlantic salmon

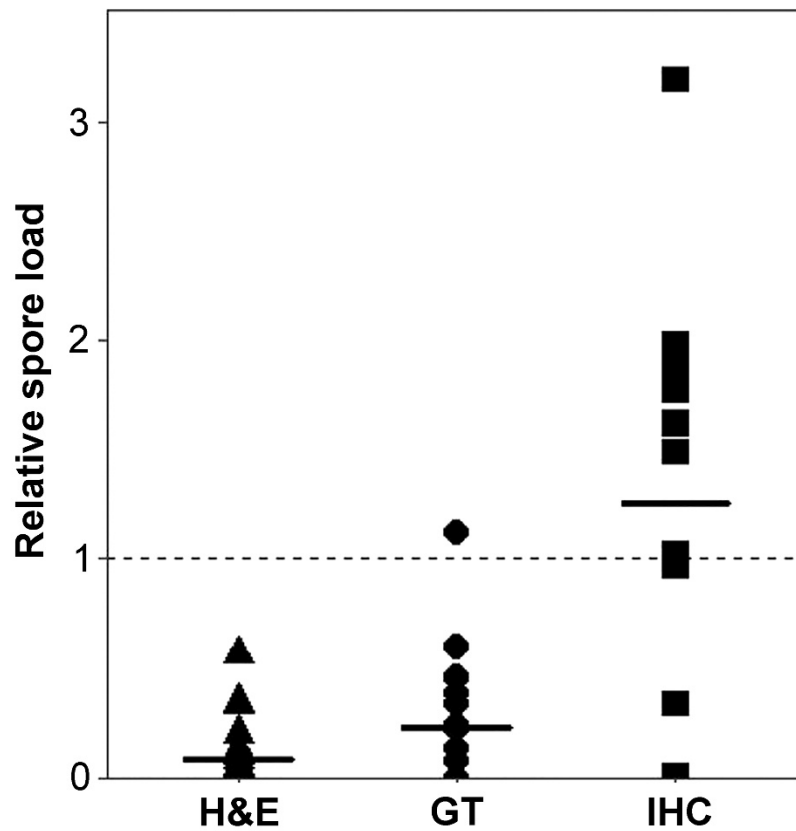

**Supplementary Figure 1.** Relative spore load detected with hematoxylin and eosin (H&E), Gram–Twort (GT), and immunohistochemistry (IHC) expressed as a ratio to calcofluor white (dashed line). The medians of the relative spore load detected with H&E, GT, and IHC are indicated by solid horizontal lines.
